# Supplementary material for: Mononuclear copper(ii) Schiff base complexes as effective models for phenoxazinone synthase
Source: Royal Society of Chemistry journal article supplement (doi:10.1039/d2nj03934f), 2022-01-01
Supplement: d2nj03934f1.pdf [file d2nj03934f1.pdf]

## Electronic Supplementary Information

### **Mononuclear copper(II) Schiff base complexes as effective models for phenoxazinone synthase**

Abinaya Sushana Thennarasu,<sup>#</sup> Thasnim P Mohammed,<sup>#</sup> and Muniyandi Sankaralingam<sup>\*</sup>

*Bioinspired & Biomimetic Inorganic Chemistry Lab, Department of Chemistry, National Institute of Technology Calicut, Kozhikode, Kerala 673601 India.*

<sup>#</sup>These authors contributed equally to this work.

<sup>\*</sup>Corresponding author e-mail: msankaralingam@nitc.ac.in; sankarjan06@gmail.com

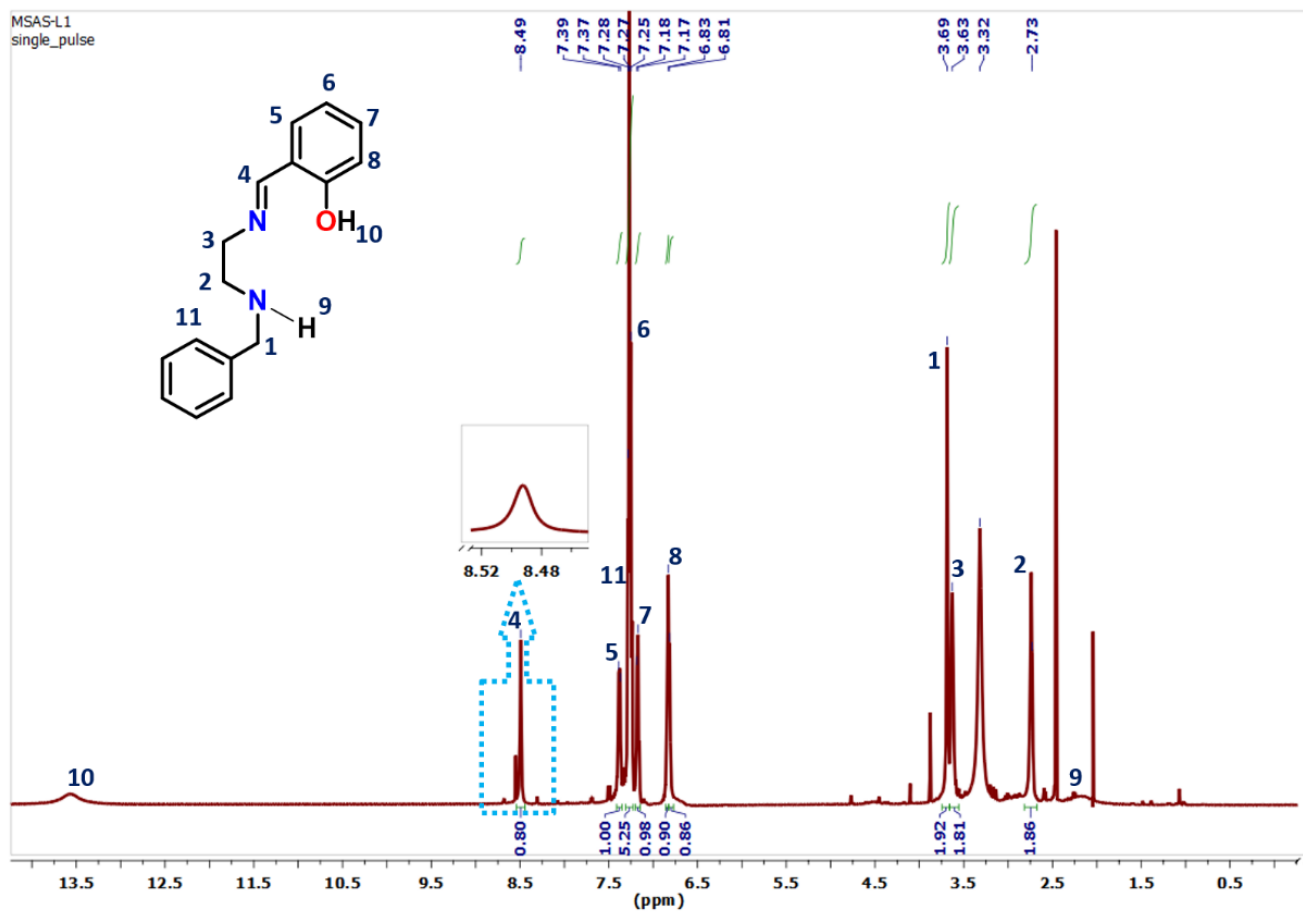

**Fig. S1**  $^1\text{H}$ NMR (500 MHz) spectrum of ligand **L1(H)** was recorded in  $\text{DMSO-d}_6$ .

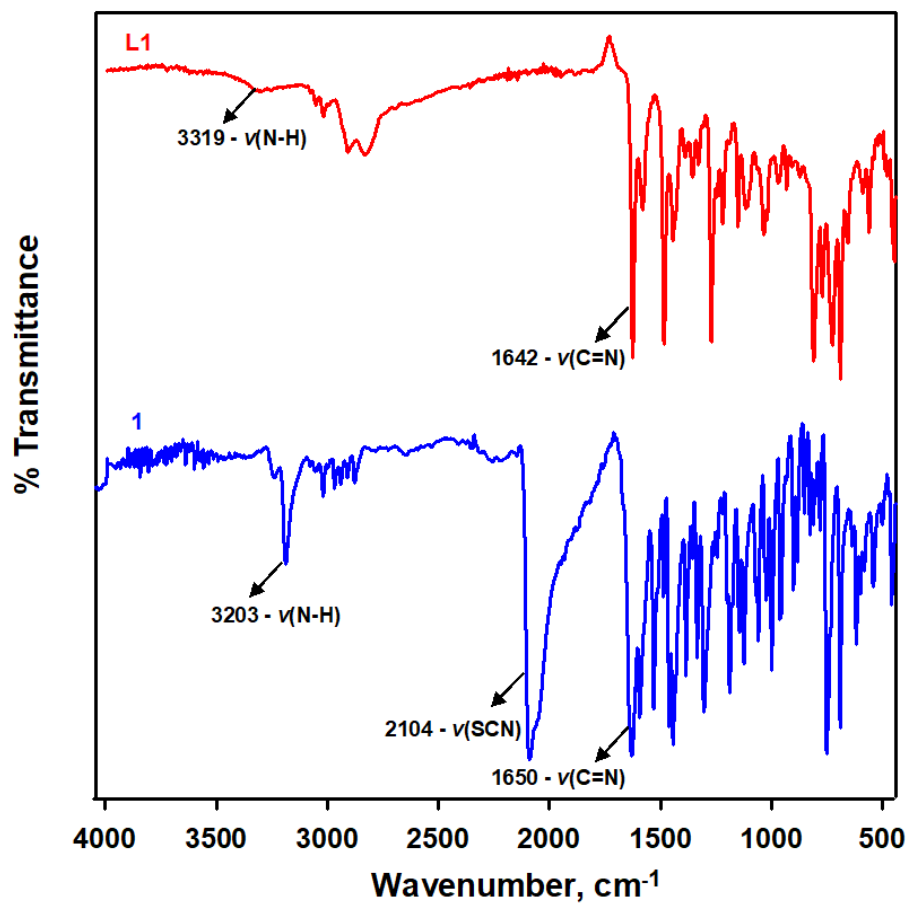

**Fig. S2** ATR spectra of ligand **L1(H)** and IR spectra of complex **1**.

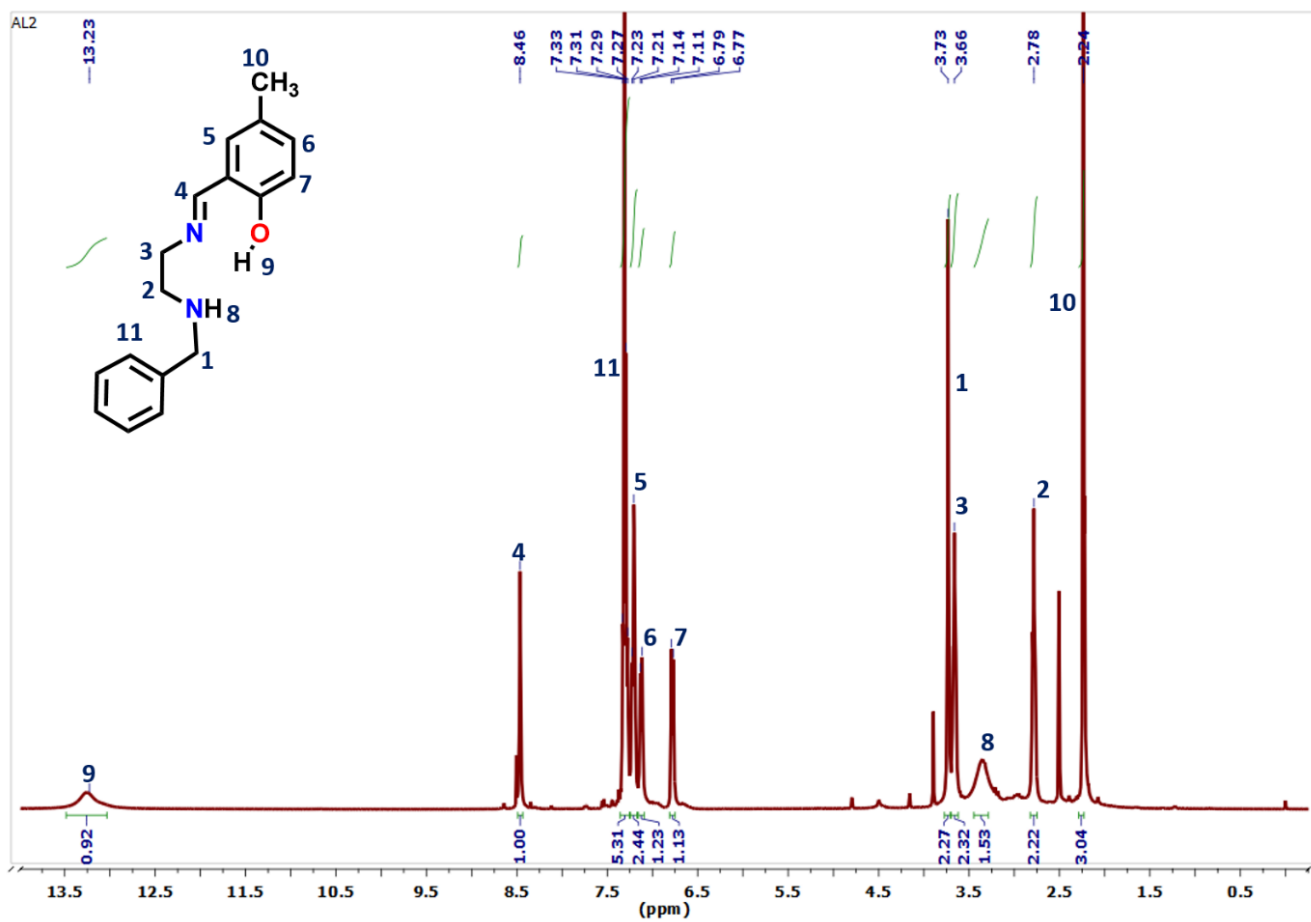

**Fig. S3** <sup>1</sup>H NMR spectrum (500 MHz) of ligand L2(H) was recorded in DMSO-d<sub>6</sub>.

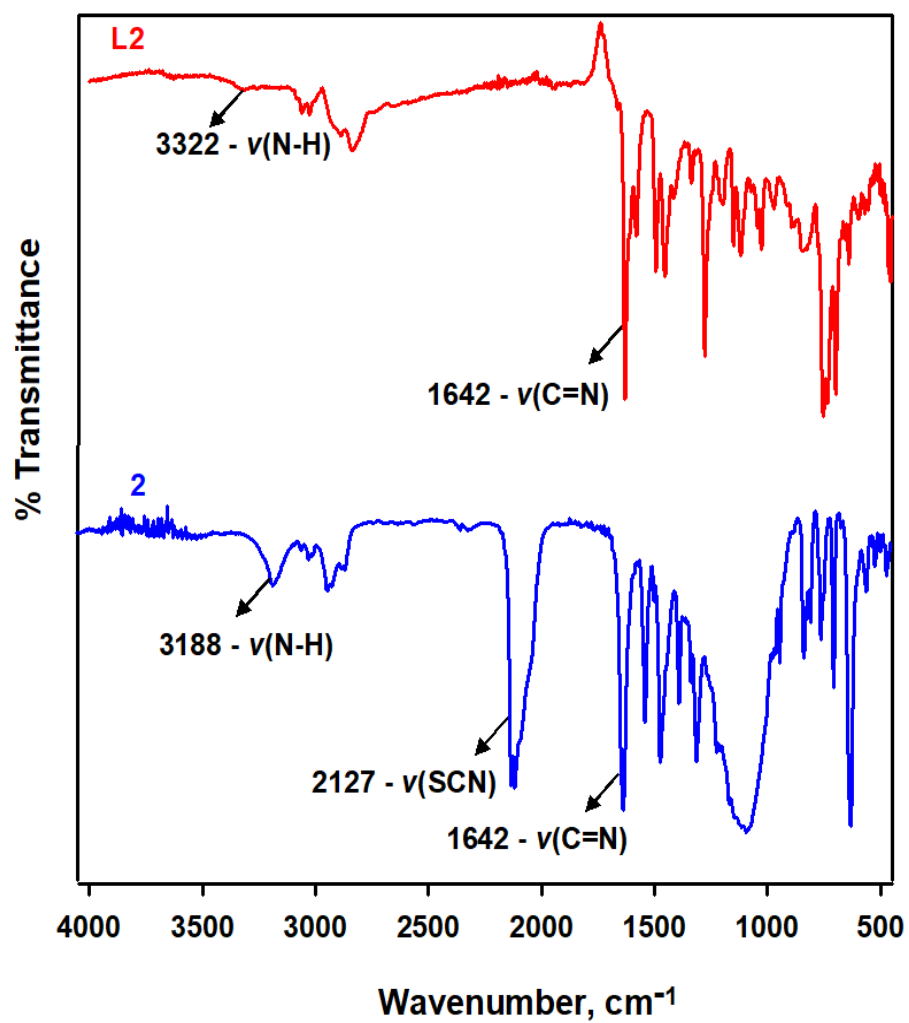

**Fig. S4** ATR spectra of ligand L2(H) and IR spectra of complex 2.

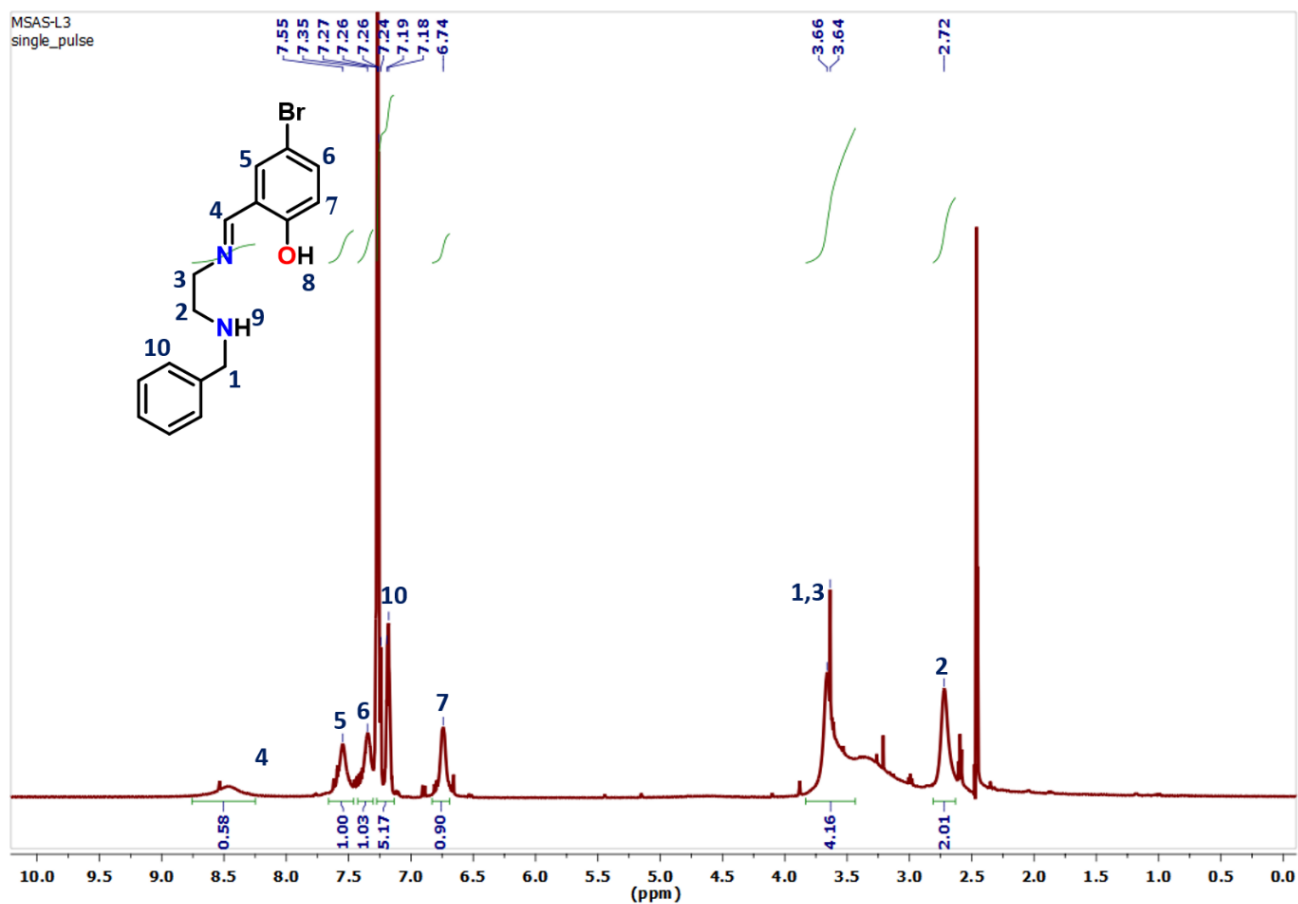

**Fig. S5**  $^1\text{H}$  NMR (500 MHz) spectrum of ligand **L3(H)** was recorded in  $\text{DMSO-d}_6$ .

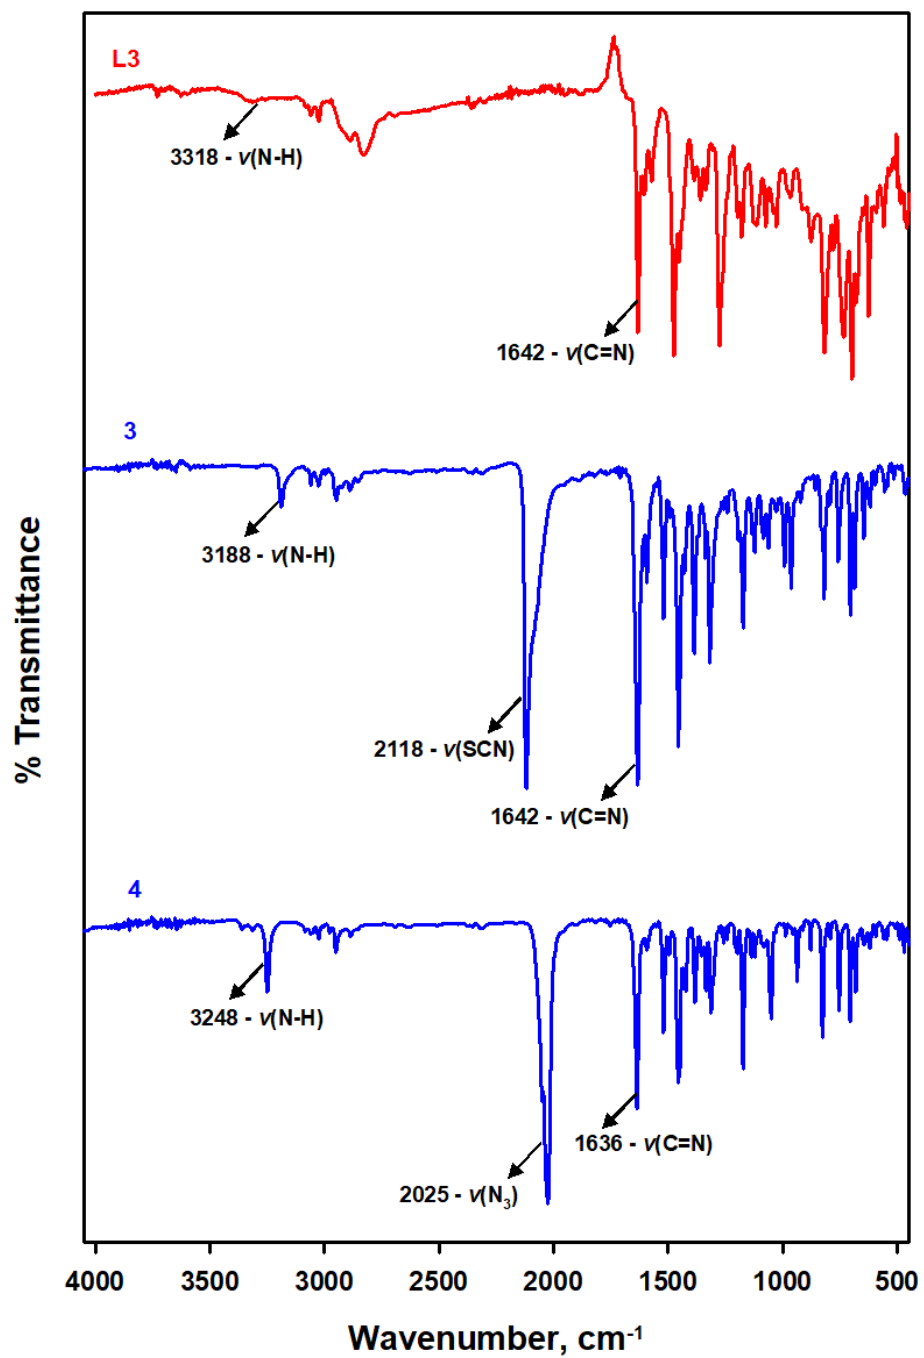

**Fig. S6** ATR spectra of ligand **L3(H)** and IR spectra of complex **3** and **4**.

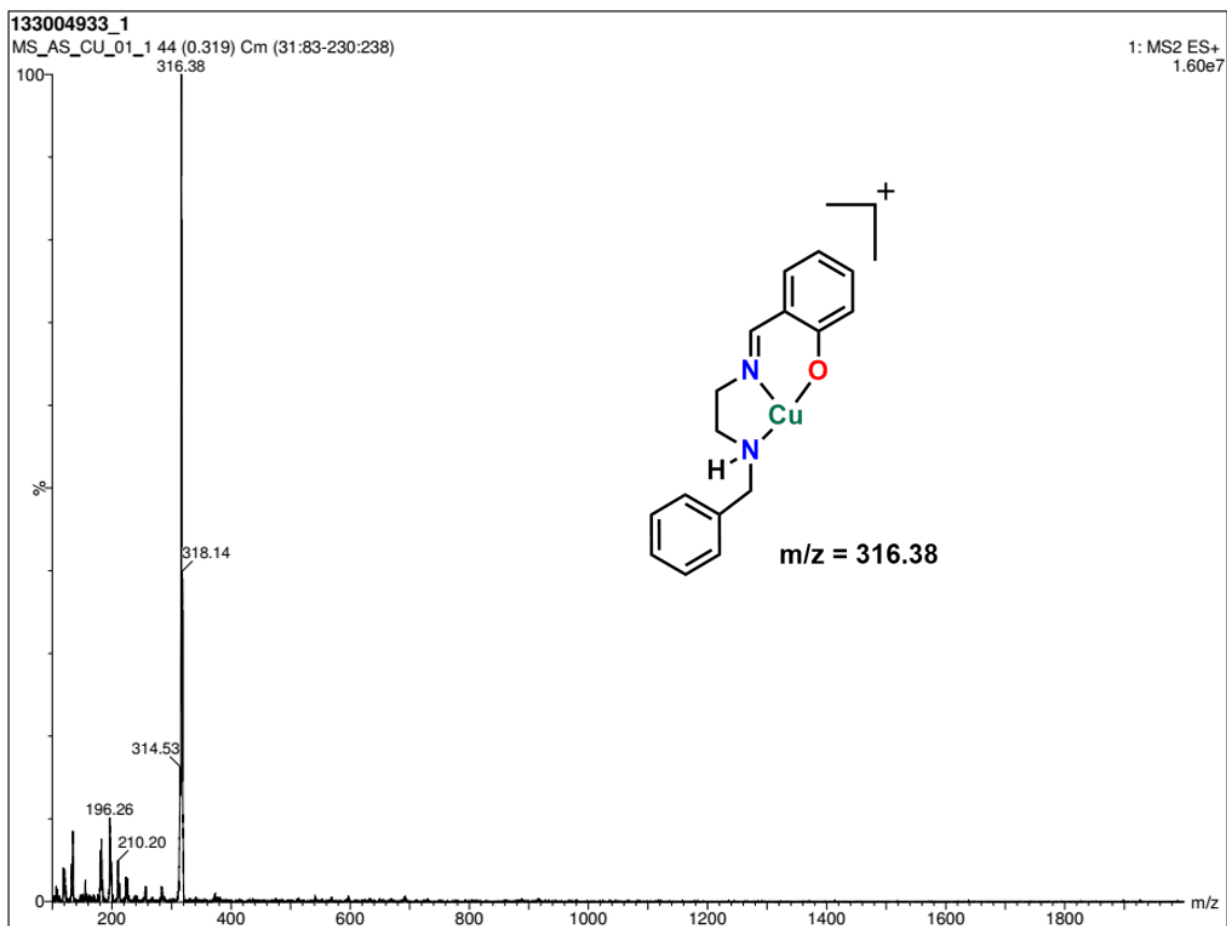

**Fig. S7** Mass spectral data of complex **1** recorded in acetonitrile.



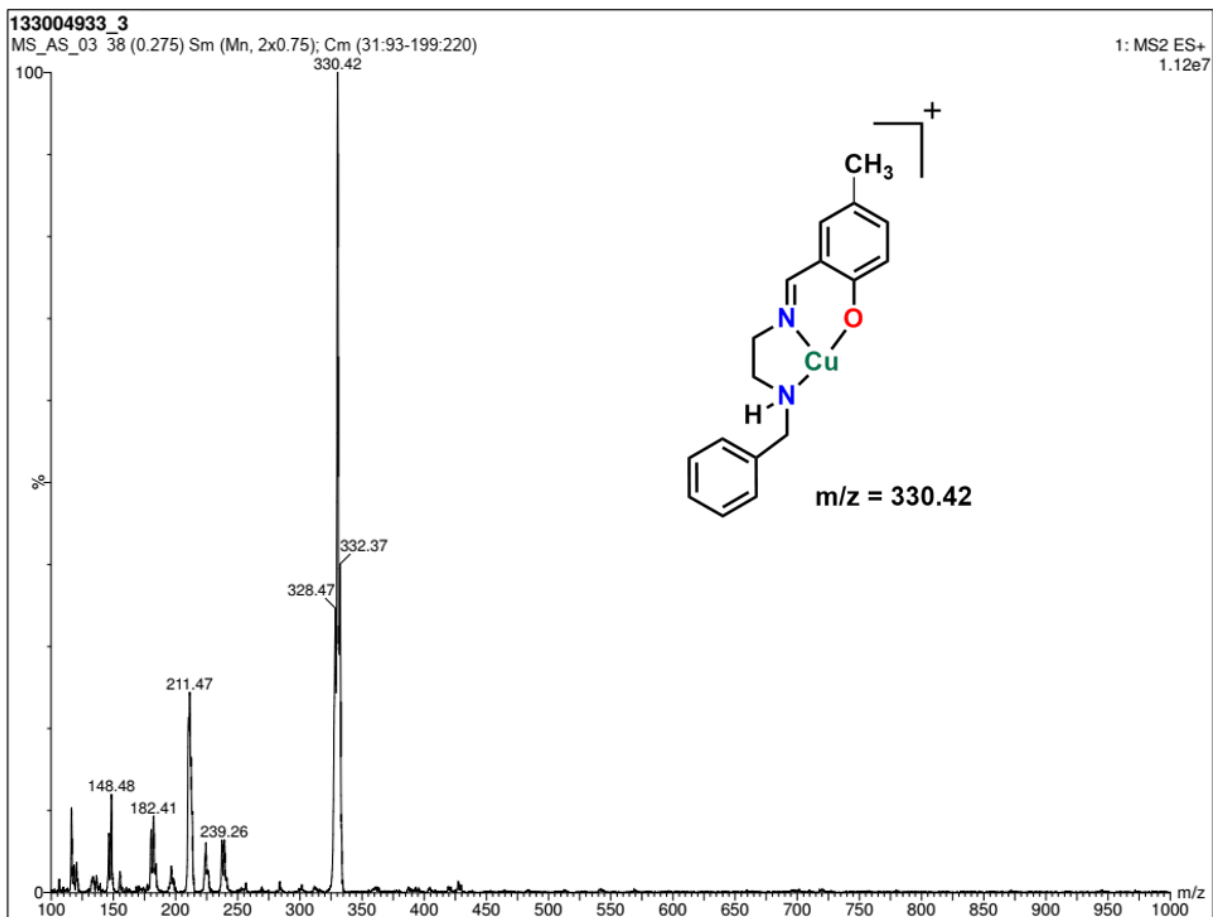

**Fig. S8** Mass spectral data of complex **2** recorded in acetonitrile.

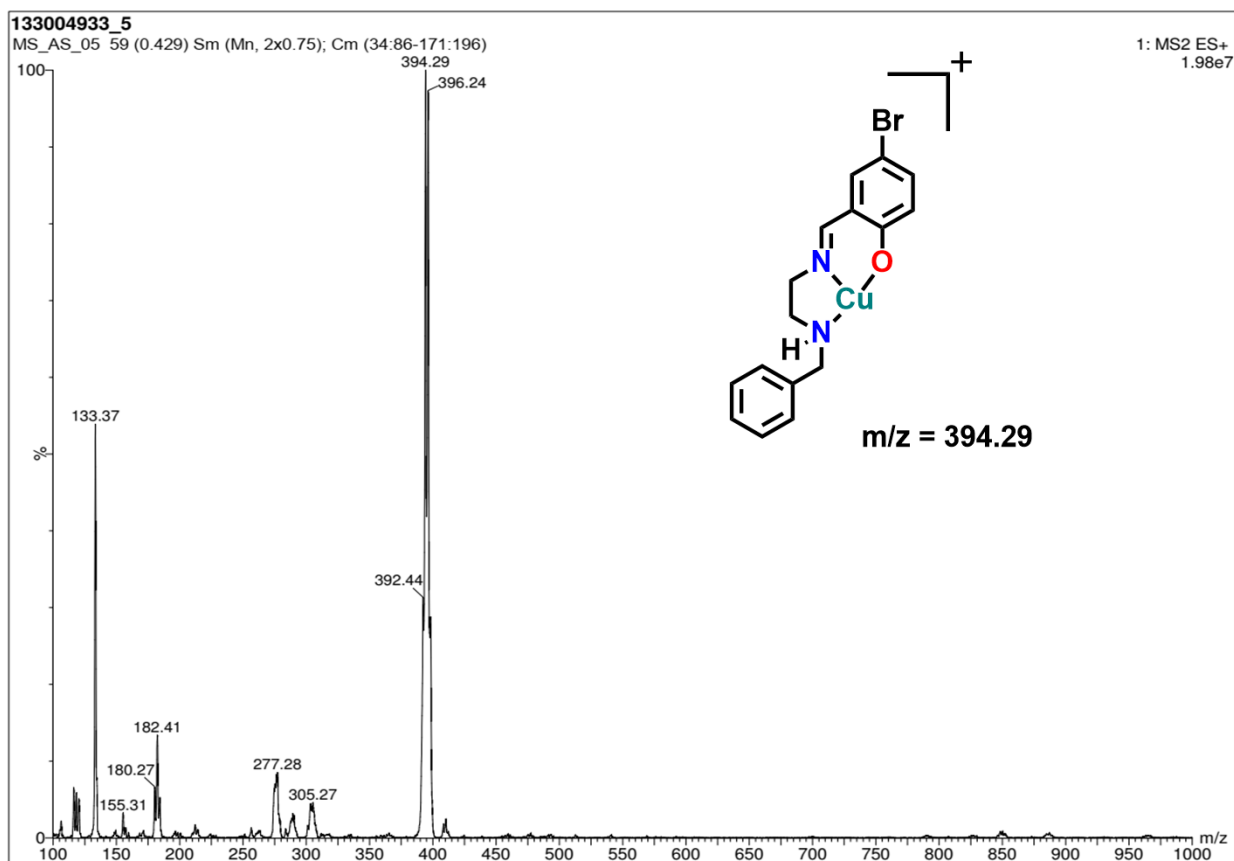

**Fig. S9** Mass spectral data of complex **3** recorded in acetonitrile.

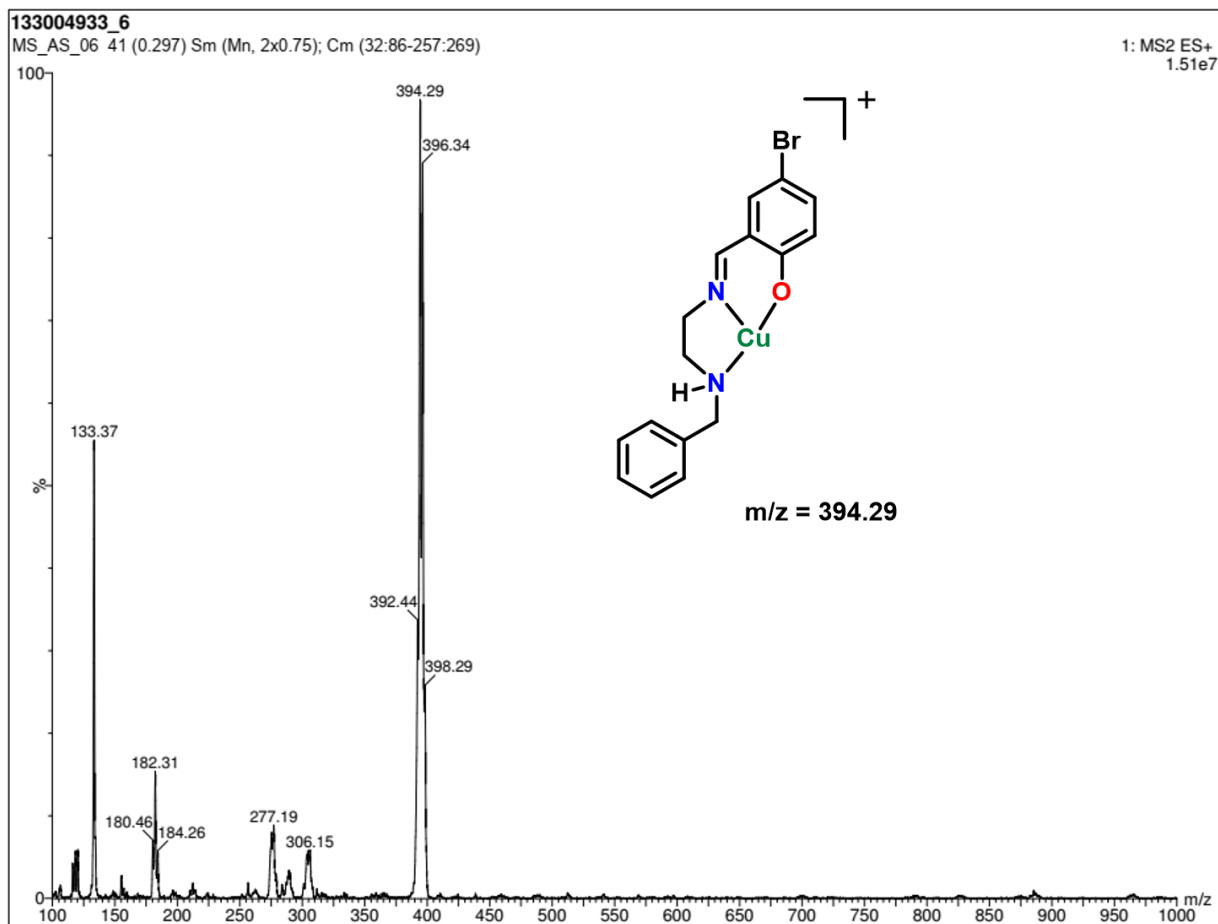

**Fig. S10** Mass spectral data of complex **4** recorded in acetonitrile.

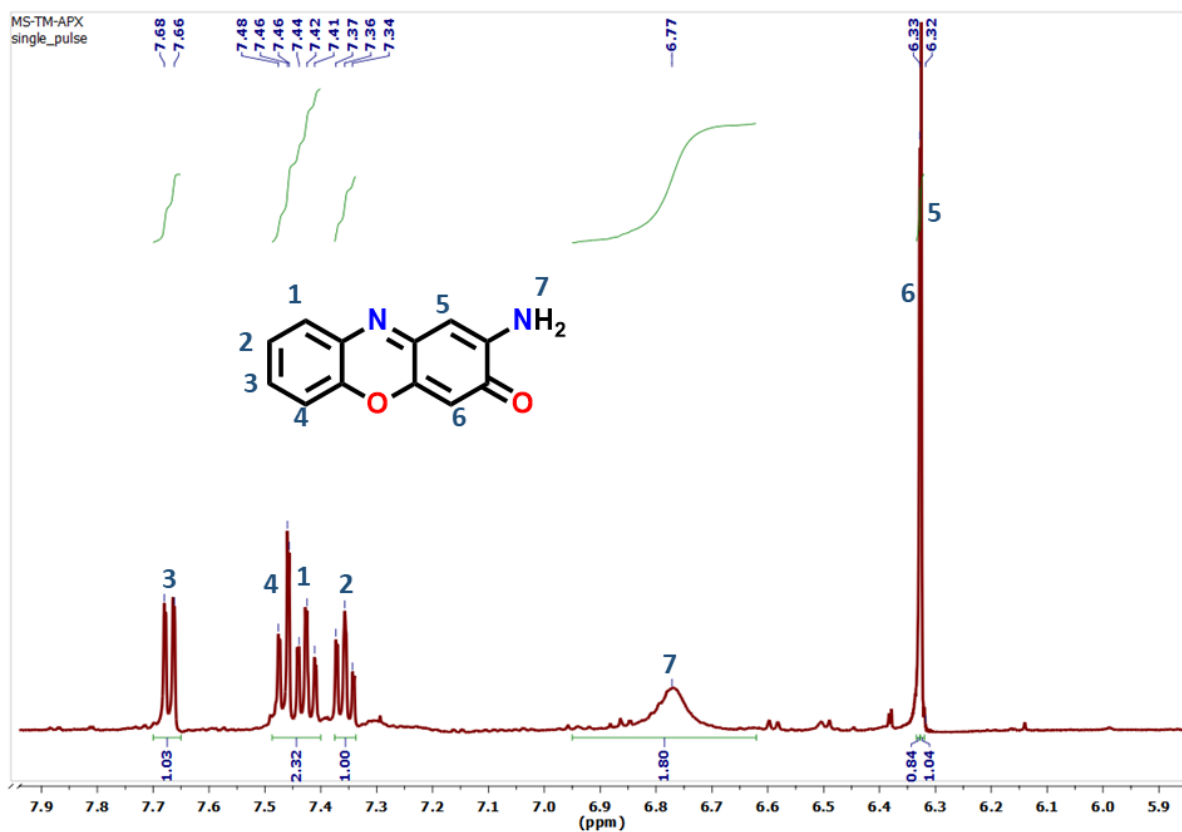

**Fig. S11**  $^1\text{H}$  NMR (500 MHz, 300 K) spectrum was recorded in  $\text{DMSO-d}_6$  for the reaction mixture of *o*-aminophenol (25 mM) and a complex **3** (5 mM) in oxygen saturated methanol at 60 °C for 6 hrs after the work-up. The  $^1\text{H}$  NMR spectrum confirms the formation of 2-aminophenoxazine-3-one (APX) in the reaction mixture as the product.

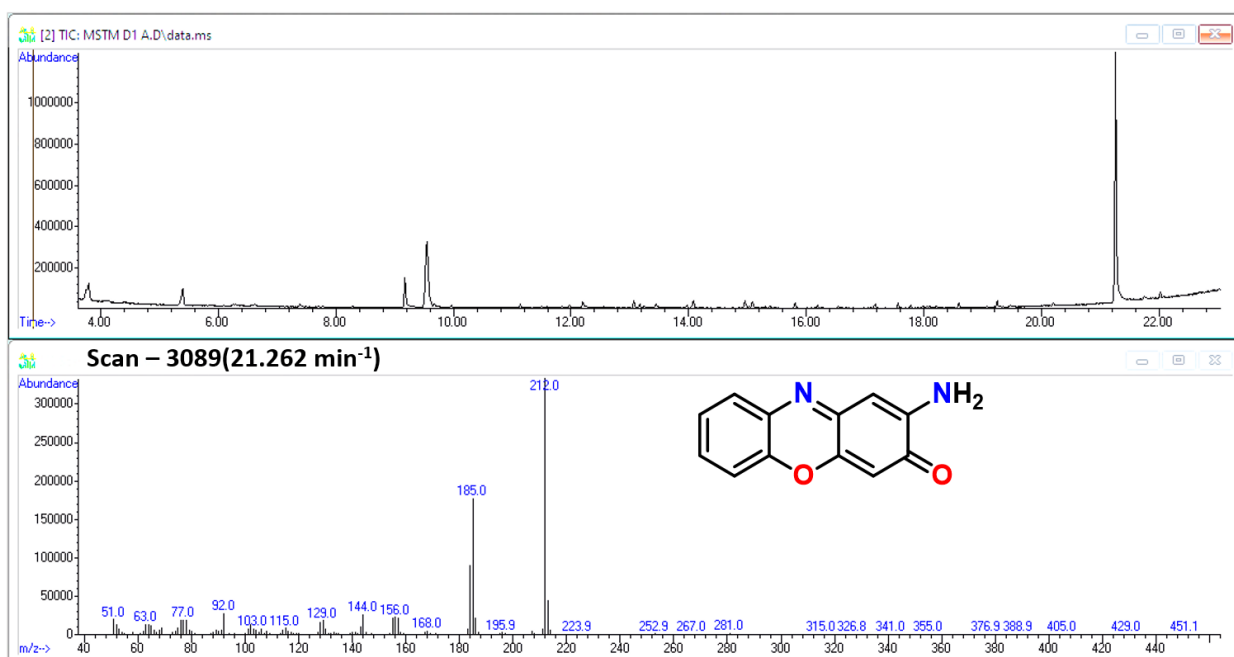

**Fig. S12** GC-MS data was recorded in methanol for the reaction mixture of *o*-aminophenol (25 mM) and a complex **3** (5 mM) in oxygen-saturated methanol at 60 °C for 6 hrs after the work-up. Among the given spectra (top) total ion chromatogram and (bottom) mass spectrum of the product, 2-amino-phenoxazine-3-one (APX) with  $m/z = 212.0$  at 21.262 min. The peaks observed in the chromatogram with the retention time of 9.543 min and 9.17 min are (3-bromophenyl)methanamine and *o*-aminophenol, respectively.

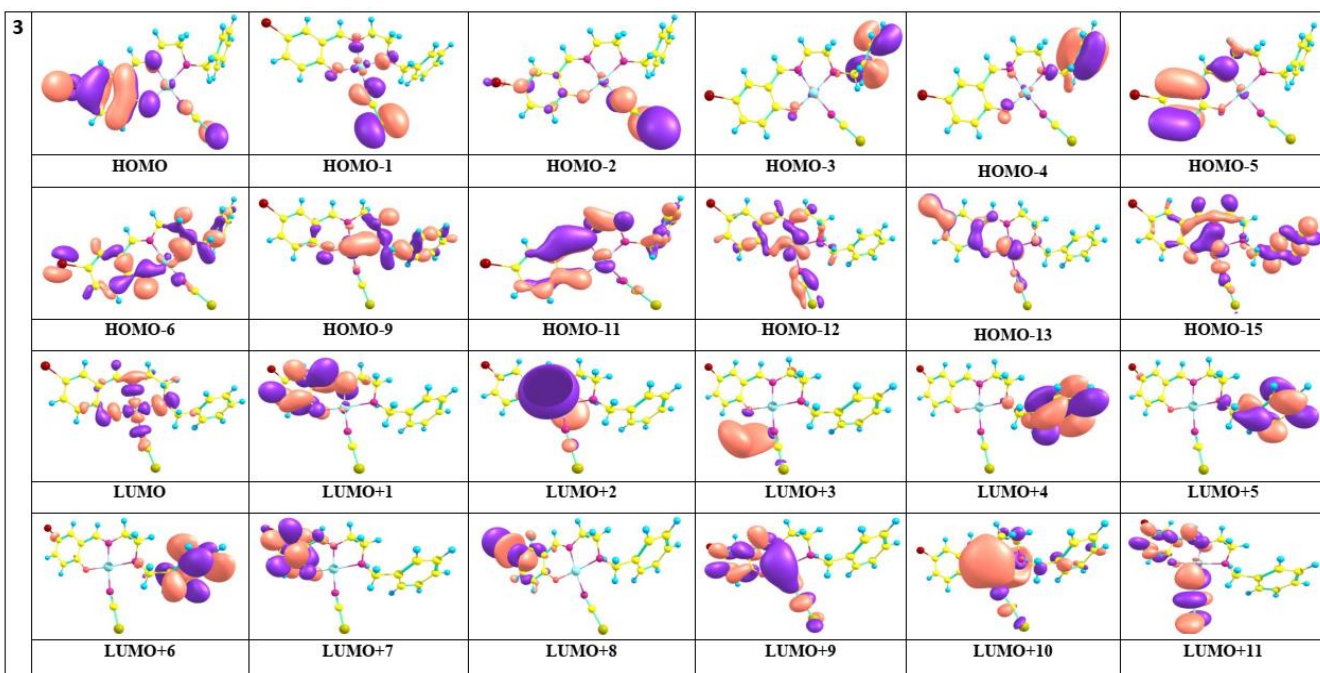

**Fig. S13** Frontier molecular orbitals (FMO) of complex **3**.

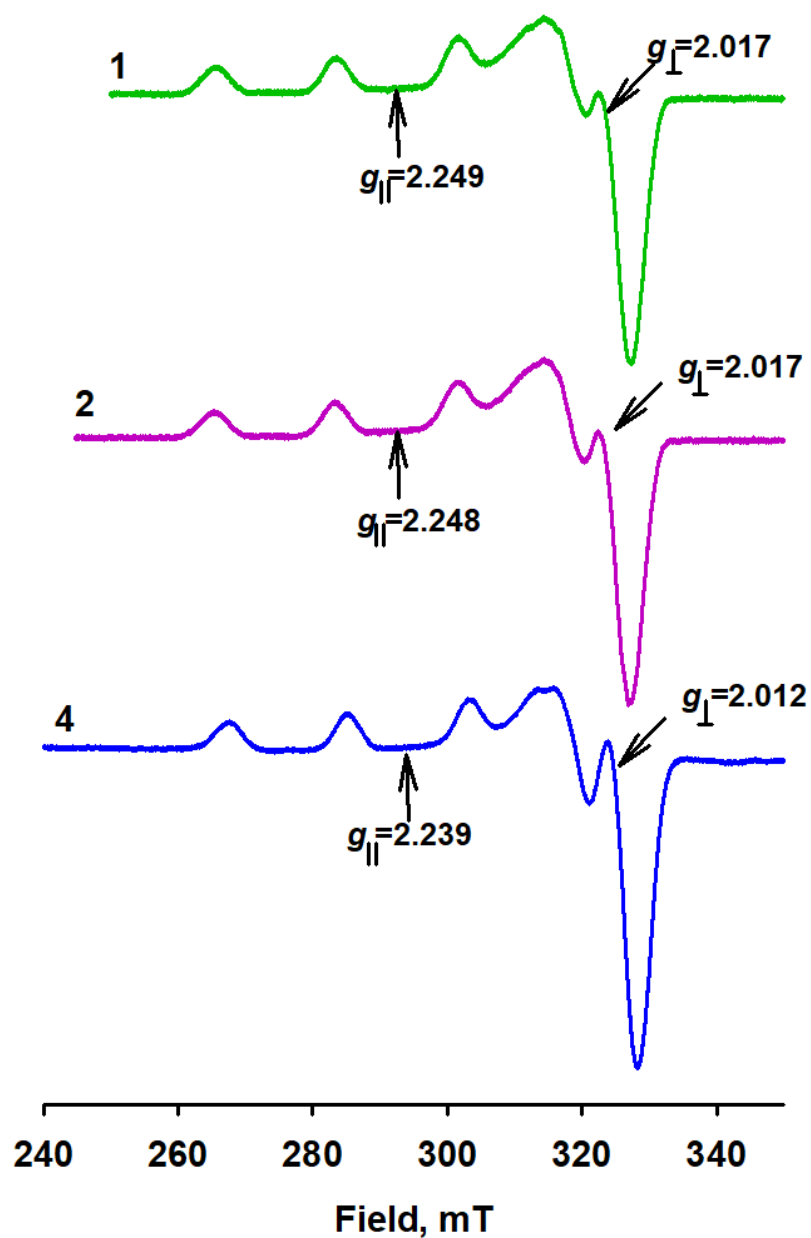

**Fig. S14** EPR spectra of **1**, **2** and **4** were measured at 77 K in methanol/DMF (4:1) solution.

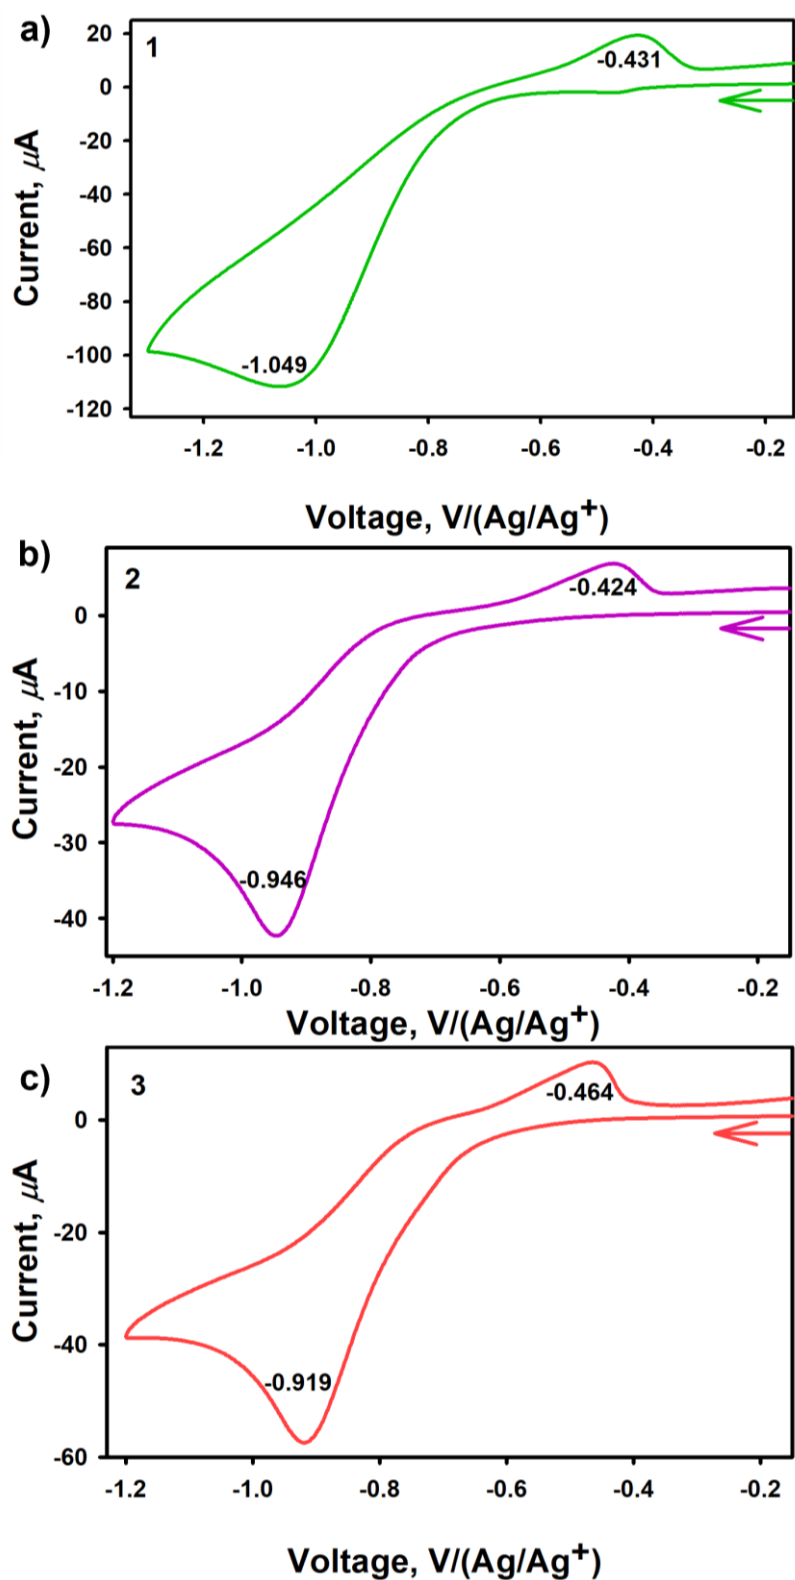

**Fig. S15** Cyclic voltammogram of the complexes **1-3** (a-c) in methanol:DMF (9:1); tetrabutylammonium hexafluorophosphate (TBAHFP) (0.1 M) as the supporting electrolyte; scan rate - 0.1 V/ s. Working electrode – glassy carbon, Auxillary electrode - platinum wire.



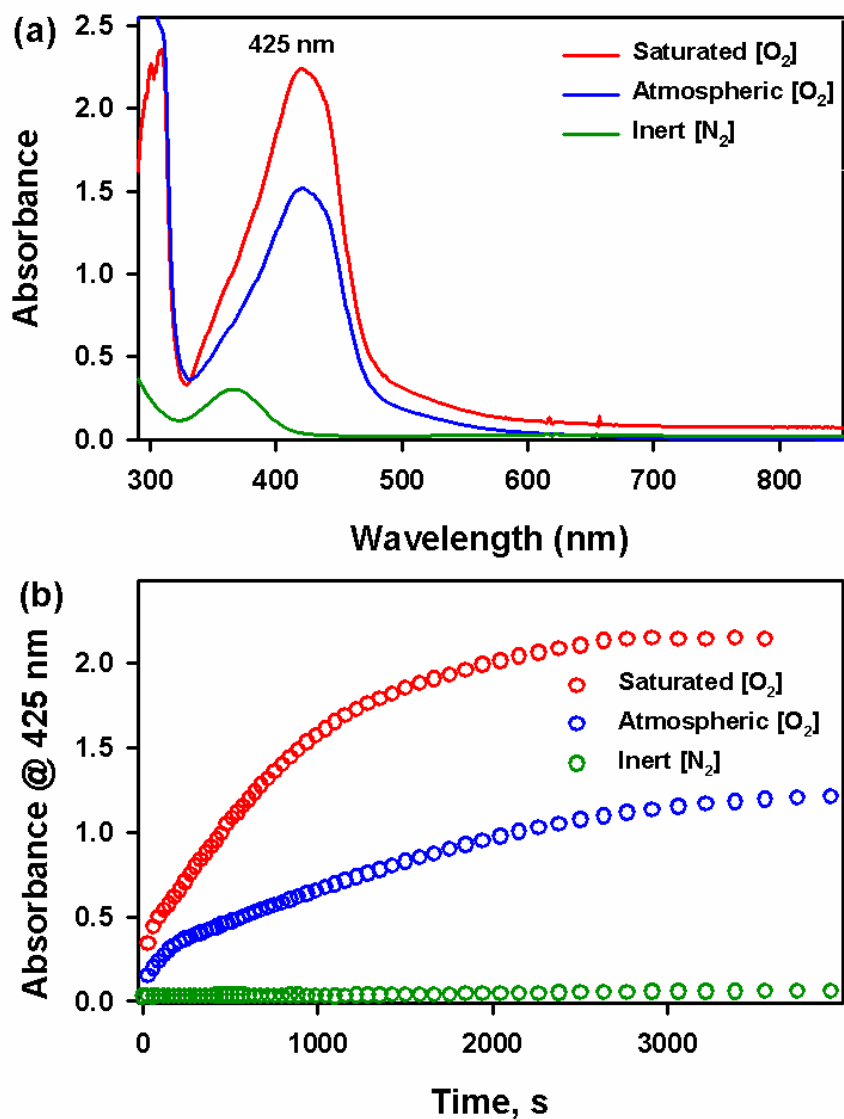

**Fig. S16** (a) UV-vis spectra for the reaction of complex **1** (0.1 mM) OAP (20 mM) in methanol with different oxygen environment. (b) Time profiles for the formation of the 2-amino-phenoxazine-3-one with an absorption at 425 nm.

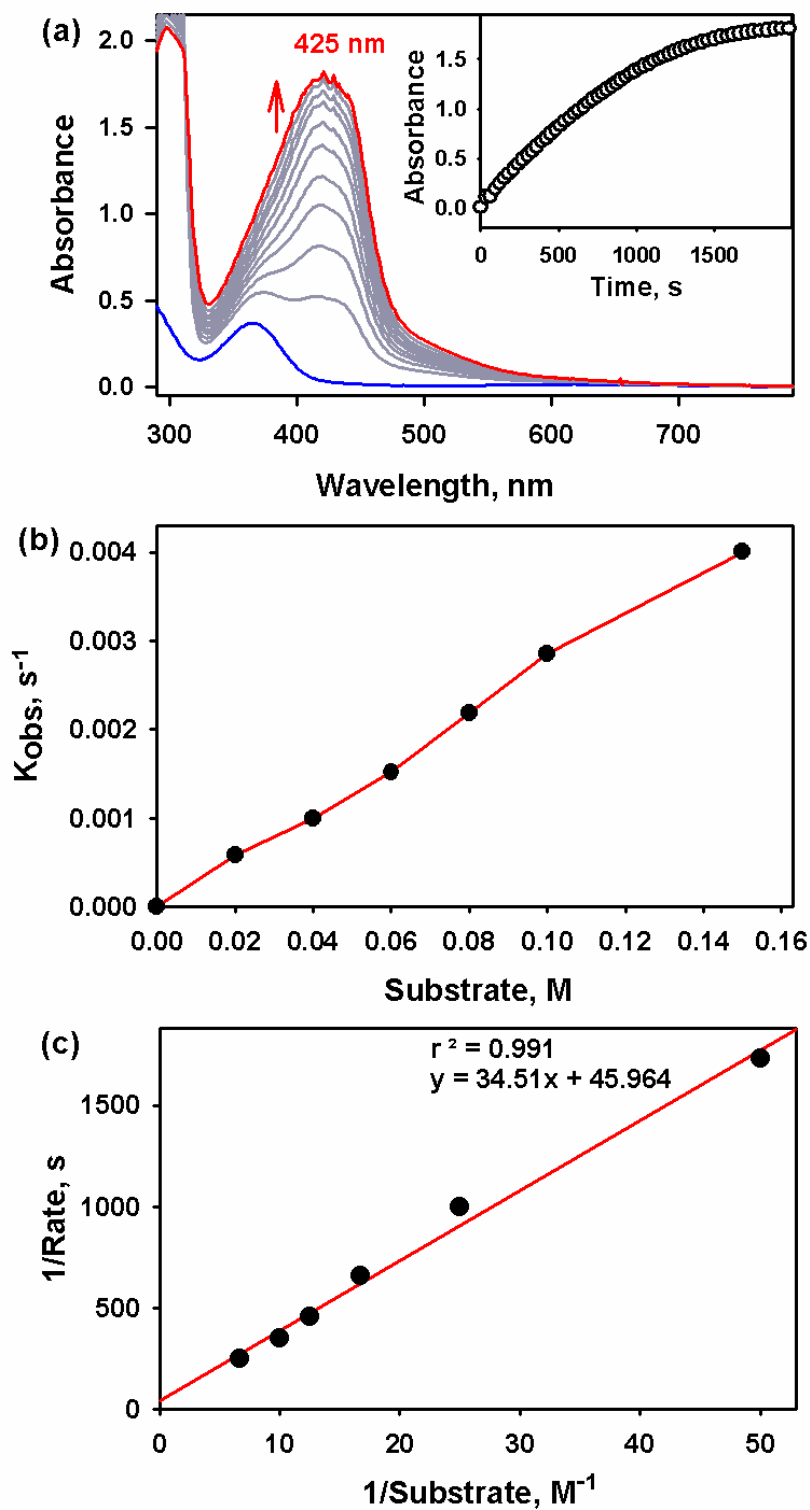

**Fig. S17** (a) UV-vis spectral profile for the formation of phenoxazinone chromophore peak at 425 nm in the reaction of complex **1** (0.1 mM) with OAP (60 mM). (b) The plot of rate vs substrate concentration. (c) Lineweaver-Burk plot for the complex **1**.

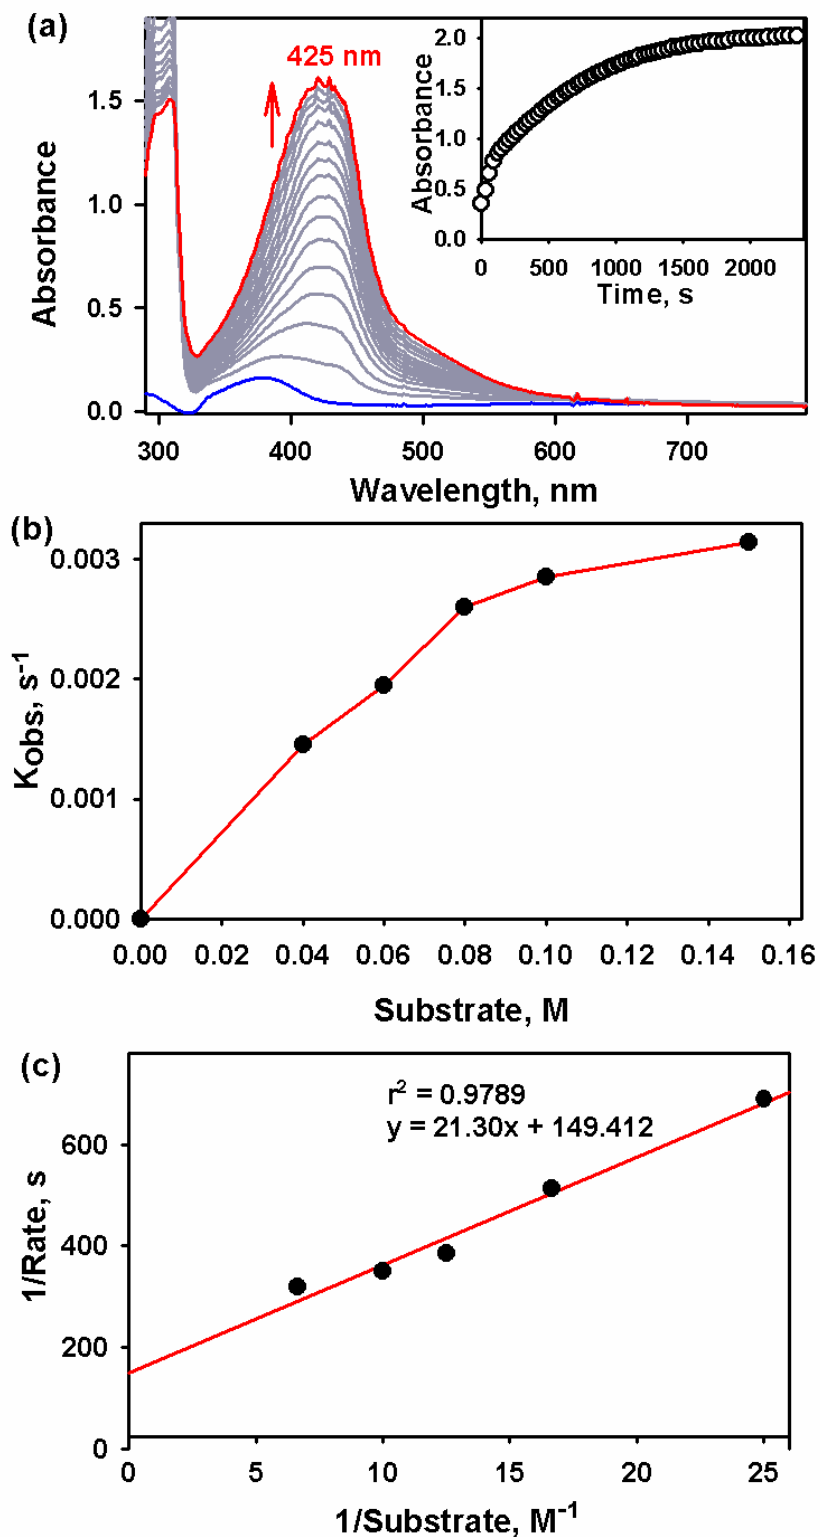

**Fig. S18** (a) UV-vis spectral profile for the formation of phenoxazinone chromophore peak at 425 nm in the reaction of complex **2** (0.1 mM) with OAP (60 mM). (b) The plot of rate vs substrate concentration. (c) Lineweaver-Burk plot for the complex **2**.

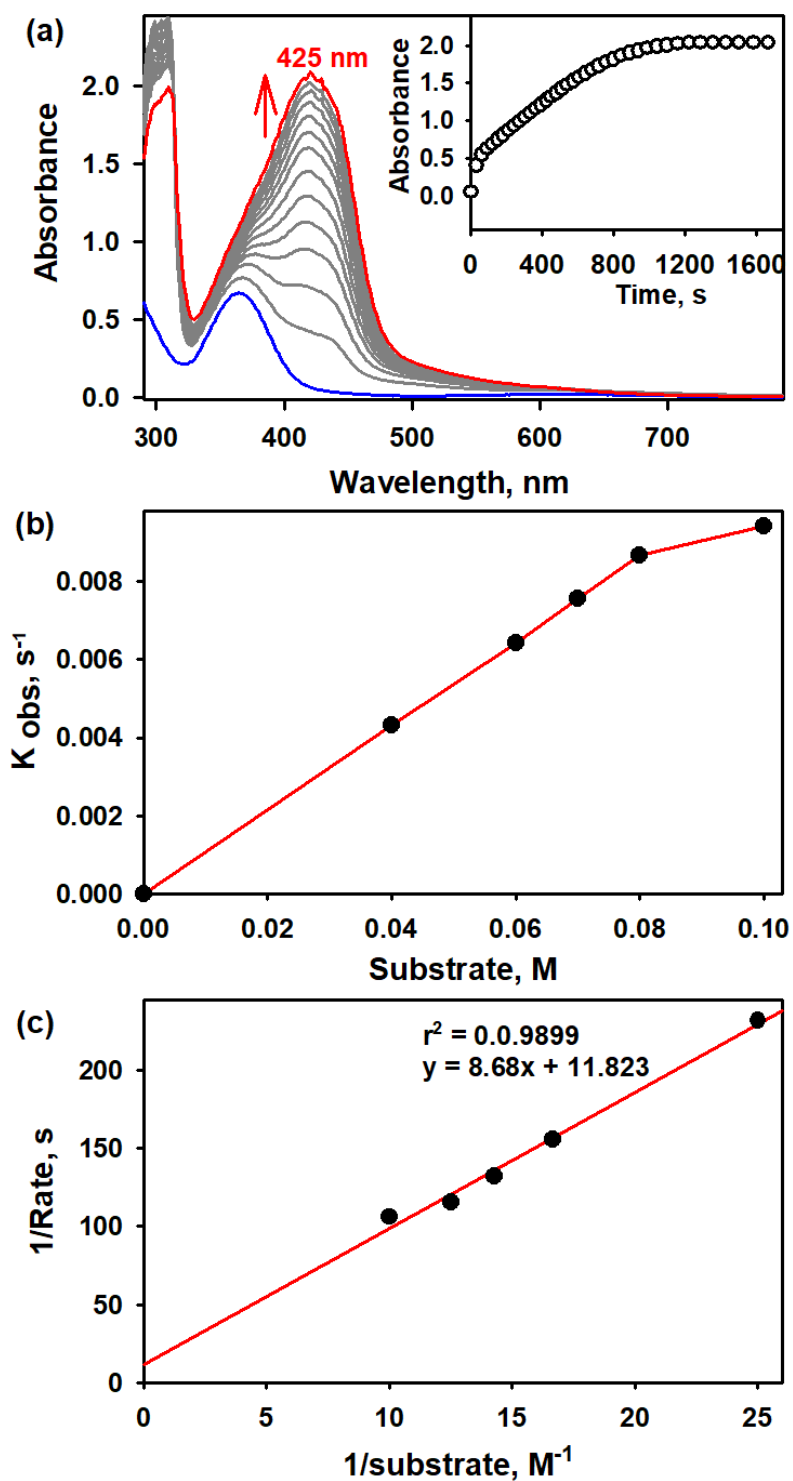

**Fig. S19** (a) UV-vis spectral profile for the formation of phenoxazinone chromophore peak at 425 nm in the reaction of complex **4** (0.1 mM) with OAP (60 mM). (b) The plot of rate vs substrate concentration. (c) Lineweaver-Burk plot for the complex **4**.

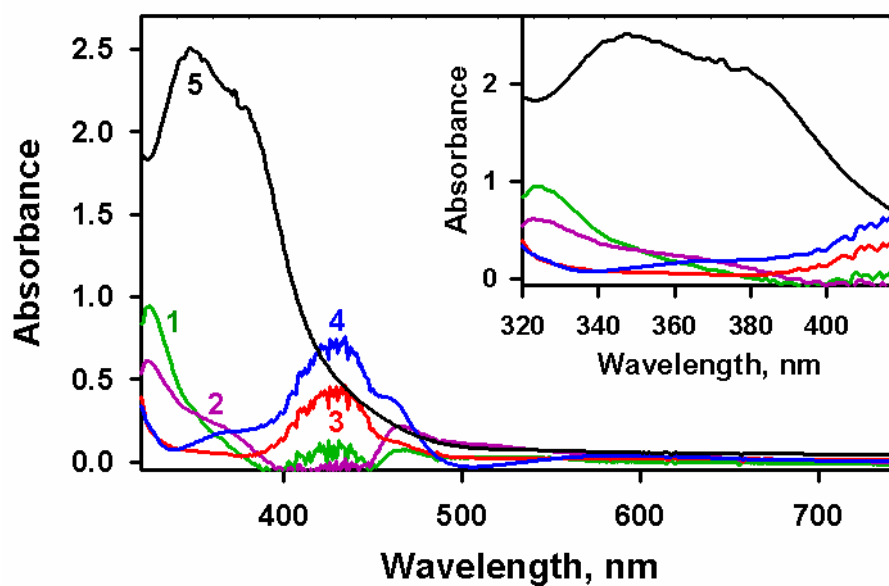

**Fig. S20** UV-vis absorption spectra for the detection of  $\text{H}_2\text{O}_2$  formation in the oxidation of OAP against 1-4, as oxygen reduced product. The reaction was monitored by treating the reaction mixture with the excess amount of NaI. The inset shows no formation of triiodide ( $\text{I}_3^-$ ) ion formation. The black line (5) represents the reaction of  $\text{H}_2\text{O}_2$  (0.1 mM) with excess NaI (100 mM) in methanol.

**Table S1.** HOMO - LUMO energy surfaces for the computed absorption spectrum of complex **3** using **m06** functional, with basis sets **6-31G** for C,H,O,S,N and **LANL2DZ** for Cu for 20 excited states.

| Compound | Excited state | Oscillator Strength (f) | Excitation energy (eV) | Wavelength (nm) | Transition                 | Coefficient of Transition | Percentage contribution |
|----------|---------------|-------------------------|------------------------|-----------------|----------------------------|---------------------------|-------------------------|
| <b>3</b> | 1             | 0.0019                  | 1.7338                 | 715.09          | HOMO – LUMO ( $\beta$ )    | 0.67667                   | 45.79                   |
|          |               |                         |                        |                 | HOMO-15 – LUMO ( $\beta$ ) | 0.12256                   | 1.50                    |
|          |               |                         |                        |                 | HOMO-13 – LUMO ( $\beta$ ) | 0.37657                   | 14.18                   |
|          |               |                         |                        |                 | HOMO-12 – LUMO ( $\beta$ ) | -0.40907                  | 16.73                   |
|          |               |                         |                        |                 | HOMO-9 – LUMO ( $\beta$ )  | 0.13152                   | 1.73                    |
|          |               |                         |                        |                 | HOMO-7 – LUMO ( $\beta$ )  | 0.21819                   | 4.76                    |
|          |               |                         |                        |                 | HOMO-6 – LUMO ( $\beta$ )  | -0.18707                  | 3.49                    |
|          |               |                         |                        |                 | HOMO-5 – LUMO ( $\beta$ )  | -0.11776                  | 1.39                    |
|          |               |                         |                        |                 | HOMO-1 – LUMO ( $\beta$ )  | -0.23333                  | 5.45                    |
|          |               |                         |                        |                 |                            |                           |                         |
|          | 2             | 0.0050                  | 1.7733                 | 699.17          | HOMO-12 – LUMO ( $\beta$ ) | 0.54921                   | 30.16                   |
|          |               |                         |                        |                 | HOMO-22 – LUMO ( $\beta$ ) | 0.10836                   | 1.17                    |
|          |               |                         |                        |                 | HOMO-15 – LUMO ( $\beta$ ) | -0.18284                  | 3.34                    |
|          |               |                         |                        |                 | HOMO-13 – LUMO ( $\beta$ ) | 0.34553                   | 11.94                   |
|          |               |                         |                        |                 | HOMO-9 – LUMO ( $\beta$ )  | -0.17334                  | 3.00                    |
|          |               |                         |                        |                 | HOMO-7 – LUMO ( $\beta$ )  | 0.12571                   | 1.58                    |
|          |               |                         |                        |                 | HOMO-6 – LUMO ( $\beta$ )  | 0.34442                   | 11.86                   |
|          |               |                         |                        |                 | HOMO-1 – LUMO ( $\beta$ )  | 0.40697                   | 16.56                   |
|          |               |                         |                        |                 | HOMO – LUMO ( $\beta$ )    | 0.40012                   | 16.01                   |
|          |               |                         |                        |                 |                            |                           |                         |

|   |        |        |        |                            |          |       |
|---|--------|--------|--------|----------------------------|----------|-------|
| 3 | 0.0006 | 1.9540 | 634.52 | HOMO-9 – LUMO ( $\beta$ )  | 0.61536  | 37.87 |
|   |        |        |        | HOMO-18 – LUMO ( $\beta$ ) | 0.10095  | 1.02  |
|   |        |        |        | HOMO-17 – LUMO ( $\beta$ ) | 0.17686  | 3.13  |
|   |        |        |        | HOMO-15 – LUMO ( $\beta$ ) | 0.28562  | 8.16  |
|   |        |        |        | HOMO-14 – LUMO ( $\beta$ ) | -0.21780 | 4.74  |
|   |        |        |        | HOMO-12 – LUMO ( $\beta$ ) | 0.26325  | 6.93  |
|   |        |        |        | HOMO-11 – LUMO ( $\beta$ ) | -0.14962 | 2.24  |
|   |        |        |        | HOMO-10 – LUMO ( $\beta$ ) | 0.56722  | 32.17 |
|   |        |        |        |                            |          |       |
| 4 | 0.0002 | 2.1502 | 576.61 | HOMO-11 – LUMO ( $\beta$ ) | 0.65348  | 42.70 |
|   |        |        |        | HOMO-26 – LUMO ( $\beta$ ) | 0.10350  | 1.07  |
|   |        |        |        | HOMO-23 – LUMO ( $\beta$ ) | 0.12550  | 1.58  |
|   |        |        |        | HOMO-16 – LUMO ( $\beta$ ) | 0.36384  | 13.24 |
|   |        |        |        | HOMO-15 – LUMO ( $\beta$ ) | 0.10681  | 1.14  |
|   |        |        |        | HOMO-12 – LUMO ( $\beta$ ) | 0.10721  | 1.15  |
|   |        |        |        | HOMO-5 – LUMO ( $\beta$ )  | -0.23133 | 5.35  |
|   |        |        |        | HOMO-2 – LUMO ( $\beta$ )  | 0.53856  | 8.41  |
|   |        |        |        |                            |          |       |
| 5 | 0.0003 | 2.7447 | 451.72 | HOMO-13 – LUMO ( $\beta$ ) | 0.57371  | 32.91 |
|   |        |        |        | HOMO-20 – LUMO ( $\beta$ ) | -0.12812 | 1.64  |
|   |        |        |        | HOMO-19 – LUMO ( $\beta$ ) | 0.25189  | 6.34  |
|   |        |        |        | HOMO-12 – LUMO ( $\beta$ ) | -0.10750 | 1.16  |
|   |        |        |        | HOMO-11 – LUMO ( $\beta$ ) | -0.24962 | 6.23  |
|   |        |        |        | HOMO-7 – LUMO ( $\beta$ )  | 0.13269  | 1.76  |
|   |        |        |        | HOMO-2 – LUMO ( $\beta$ )  | 0.45304  | 20.52 |

|   |        |        |        |  |                                 |          |       |
|---|--------|--------|--------|--|---------------------------------|----------|-------|
|   |        |        |        |  | HOMO –<br>LUMO ( $\beta$ )      | -0.49732 | 24.73 |
| 6 | 0.0002 | 2.8500 | 435.03 |  | HOMO –<br>LUMO+1 ( $\beta$ )    | 0.67208  | 45.17 |
|   |        |        |        |  | HOMO-6 –<br>LUMO ( $\alpha$ )   | -0.11547 | 1.33  |
|   |        |        |        |  | HOMO-2 –<br>LUMO ( $\alpha$ )   | 0.15955  | 2.55  |
|   |        |        |        |  | HOMO –<br>LUMO ( $\alpha$ )     | -0.66322 | 43.98 |
|   |        |        |        |  | HOMO-5 –<br>LUMO+1 ( $\beta$ )  | -0.11115 | 1.24  |
|   |        |        |        |  | HOMO-2 –<br>LUMO+1 ( $\beta$ )  | -0.14968 | 2.24  |
| 7 | 0.0006 | 2.9071 | 426.49 |  | HOMO-1 –<br>LUMO ( $\beta$ )    | 0.86415  | 74.68 |
|   |        |        |        |  | HOMO-12 –<br>LUMO ( $\beta$ )   | -0.33927 | 11.51 |
|   |        |        |        |  | HOMO-6 –<br>LUMO ( $\beta$ )    | -0.28477 | 8.11  |
| 8 | 0.0005 | 3.0435 | 407.37 |  | HOMO-2 –<br>LUMO ( $\beta$ )    | 0.69058  | 47.69 |
|   |        |        |        |  | HOMO-23 –<br>LUMO ( $\beta$ )   | -0.18310 | 3.35  |
|   |        |        |        |  | HOMO-16 –<br>LUMO ( $\beta$ )   | -0.21083 | 4.44  |
|   |        |        |        |  | HOMO-13 –<br>LUMO ( $\beta$ )   | -0.36376 | 13.23 |
|   |        |        |        |  | HOMO-11 –<br>LUMO ( $\beta$ )   | -0.30271 | 9.16  |
|   |        |        |        |  | HOMO-5 –<br>LUMO ( $\beta$ )    | 0.27777  | 7.72  |
|   |        |        |        |  | HOMO–<br>LUMO ( $\beta$ )       | 0.33178  | 11.01 |
| 9 | 0.0003 | 3.4428 | 360.12 |  | HOMO-5 –<br>LUMO+1 ( $\beta$ )  | 0.55732  | 31.06 |
|   |        |        |        |  | HOMO-6 –<br>LUMO ( $\alpha$ )   | 0.54933  | 30.18 |
|   |        |        |        |  | HOMO-6 –<br>LUMO+6 ( $\alpha$ ) | -0.14853 | 2.21  |
|   |        |        |        |  | HOMO-3 –<br>LUMO ( $\alpha$ )   | -0.21011 | 4.41  |
|   |        |        |        |  | HOMO-1 –<br>LUMO+1 ( $\alpha$ ) | -0.10214 | 1.04  |



|    |        |        |        |  |                              |          |       |
|----|--------|--------|--------|--|------------------------------|----------|-------|
|    |        |        |        |  | HOMO – LUMO( $\alpha$ )      | -0.11519 | 1.33  |
|    |        |        |        |  | HOMO – LUMO+6 ( $\alpha$ )   | 0.29444  | 8.67  |
|    |        |        |        |  | HOMO-5– LUMO+7 ( $\beta$ )   | -0.14941 | 2.23  |
|    |        |        |        |  | HOMO– LUMO+7 ( $\beta$ )     | -0.29747 | 8.85  |
|    |        |        |        |  |                              |          |       |
| 10 | 0.0018 | 3.5686 | 347.43 |  | HOMO-3 – LUMO ( $\alpha$ )   | 0.80703  | 65.12 |
|    |        |        |        |  | HOMO-6 – LUMO ( $\alpha$ )   | 0.14397  | 2.07  |
|    |        |        |        |  | HOMO-5 – LUMO ( $\alpha$ )   | -0.11612 | 1.35  |
|    |        |        |        |  | HOMO-1 – LUMO ( $\alpha$ )   | 0.43375  | 18.81 |
|    |        |        |        |  | HOMO– LUMO ( $\alpha$ )      | 0.10638  | 1.13  |
|    |        |        |        |  | HOMO-5– LUMO+1 ( $\beta$ )   | 0.12310  | 1.52  |
|    |        |        |        |  | HOMO– LUMO+1 ( $\beta$ )     | 0.10661  | 1.14  |
|    |        |        |        |  |                              |          |       |
| 11 | 0.0411 | 3.5889 | 345.47 |  | HOMO – LUMO+1( $\beta$ )     | 0.57360  | 32.90 |
|    |        |        |        |  | HOMO-3 – LUMO ( $\alpha$ )   | -0.13255 | 1.76  |
|    |        |        |        |  | HOMO-3 – LUMO ( $\alpha$ )   | -0.10958 | 1.20  |
|    |        |        |        |  | HOMO-3 – LUMO ( $\alpha$ )   | 0.56078  | 31.45 |
|    |        |        |        |  | HOMO – LUMO+1( $\beta$ )     | 0.15100  | 2.28  |
|    |        |        |        |  | HOMO – LUMO+1( $\beta$ )     | -0.20231 | 4.09  |
|    |        |        |        |  | HOMO – LUMO+1( $\beta$ )     | 0.33690  | 11.35 |
|    |        |        |        |  | HOMO – LUMO+1( $\beta$ )     | 0.15640  | 2.47  |
|    |        |        |        |  | HOMO – LUMO+1( $\beta$ )     | 0.24239  | 5.88  |
|    |        |        |        |  |                              |          |       |
| 12 | 0.0825 | 3.7744 | 328.49 |  | HOMO-3 - LUMO( $\beta$ )     | 0.61635  | 37.99 |
|    |        |        |        |  | HOMO-5 – LUMO+4 ( $\alpha$ ) | -0.19747 | 3.89  |
|    |        |        |        |  | HOMO-5 – LUMO+5 ( $\alpha$ ) | 0.15847  | 2.51  |

|    |        |        |        |  |                              |          |       |
|----|--------|--------|--------|--|------------------------------|----------|-------|
|    |        |        |        |  | HOMO-4 – LUMO+3 ( $\alpha$ ) | -0.25637 | 6.57  |
|    |        |        |        |  | HOMO-4 – LUMO+5 ( $\alpha$ ) | 0.14760  | 2.18  |
|    |        |        |        |  | HOMO– LUMO ( $\alpha$ )      | 0.22716  | 5.16  |
|    |        |        |        |  | HOMO-4 - LUMO( $\beta$ )     | -0.38597 | 14.89 |
|    |        |        |        |  | HOMO-4 – LUMO+5( $\beta$ )   | 0.12763  | 1.63  |
|    |        |        |        |  | HOMO-4 – LUMO+6( $\beta$ )   | -0.22830 | 5.21  |
|    |        |        |        |  | HOMO-3 – LUMO+4( $\beta$ )   | 0.25073  | 6.28  |
|    |        |        |        |  | HOMO-3 – LUMO+5( $\beta$ )   | -0.18360 | 3.37  |
|    |        |        |        |  | HOMO– LUMO+1( $\beta$ )      | 0.22293  | 4.97  |
|    |        |        |        |  |                              |          |       |
| 13 | 0.0086 | 3.8945 | 318.36 |  | HOMO-5 - LUMO( $\beta$ )     | 0.86901  | 75.52 |
|    |        |        |        |  | HOMO-16 - LUMO( $\beta$ )    | 0.23517  | 5.53  |
|    |        |        |        |  | HOMO-11 - LUMO( $\beta$ )    | 0.22438  | 5.03  |
|    |        |        |        |  | HOMO-3 - LUMO( $\beta$ )     | -0.12815 | 1.64  |
|    |        |        |        |  | HOMO-2 - LUMO( $\beta$ )     | -0.11421 | 1.30  |
|    |        |        |        |  |                              |          |       |
| 14 | 0.0827 | 3.9261 | 315.80 |  | HOMO-3 - LUMO( $\beta$ )     | 0.59160  | 34.99 |
|    |        |        |        |  | HOMO-5– LUMO+4 ( $\alpha$ )  | 0.21578  | 4.65  |
|    |        |        |        |  | HOMO-5– LUMO+5 ( $\alpha$ )  | -0.19006 | 3.61  |
|    |        |        |        |  | HOMO-4– LUMO+3 ( $\alpha$ )  | 0.26241  | 6.88  |
|    |        |        |        |  | HOMO-4– LUMO+5 ( $\alpha$ )  | -0.17354 | 3.01  |
|    |        |        |        |  | HOMO– LUMO ( $\alpha$ )      | 0.15428  | 2.38  |
|    |        |        |        |  | HOMO-11– LUMO ( $\beta$ )    | 0.15142  | 2.29  |
|    |        |        |        |  | HOMO-6– LUMO ( $\beta$ )     | -0.23504 | 5.52  |
|    |        |        |        |  | HOMO-5– LUMO ( $\beta$ )     | 0.25648  | 6.58  |

|    |        |        |        |  |                                |          |       |
|----|--------|--------|--------|--|--------------------------------|----------|-------|
|    |        |        |        |  | HOMO-4–<br>LUMO ( $\beta$ )    | 0.21697  | 4.71  |
|    |        |        |        |  | HOMO-4–<br>LUMO-5 ( $\beta$ )  | -0.13487 | 1.82  |
|    |        |        |        |  | HOMO-4–<br>LUMO-6 ( $\beta$ )  | 0.25454  | 6.48  |
|    |        |        |        |  | HOMO-3–<br>LUMO-4 ( $\beta$ )  | -0.25689 | 6.59  |
|    |        |        |        |  | HOMO-3–<br>LUMO-5 ( $\beta$ )  | 0.15224  | 15.29 |
|    |        |        |        |  | HOMO–<br>LUMO+1 ( $\beta$ )    | 0.14850  | 2.21  |
|    |        |        |        |  |                                |          |       |
| 15 | 0.0759 | 3.9724 | 312.11 |  | HOMO-4 -<br>LUMO( $\beta$ )    | 0.80898  | 65.44 |
|    |        |        |        |  | HOMO-4–<br>LUMO+3 ( $\alpha$ ) | -0.18667 | 3.48  |
|    |        |        |        |  | HOMO–<br>LUMO ( $\alpha$ )     | -0.13513 | 1.83  |
|    |        |        |        |  | HOMO-12 -<br>LUMO( $\beta$ )   | -0.15873 | 2.52  |
|    |        |        |        |  | HOMO-6 -<br>LUMO( $\beta$ )    | 0.22653  | 5.13  |
|    |        |        |        |  | HOMO-4 –<br>LUMO+6( $\beta$ )  | -0.11294 | 1.27  |
|    |        |        |        |  | HOMO-3 -<br>LUMO( $\beta$ )    | 0.29925  | 8.95  |
|    |        |        |        |  | HOMO-3 –<br>LUMO+4( $\beta$ )  | 0.16608  | 2.76  |
|    |        |        |        |  | HOMO-3 –<br>LUMO+5( $\beta$ )  | -0.11830 | 1.39  |
|    |        |        |        |  | HOMO-<br>LUMO+1( $\beta$ )     | 0.12875  | 1.66  |
|    |        |        |        |  |                                |          |       |
| 16 | 0.1169 | 4.0813 | 303.78 |  | HOMO-6 -<br>LUMO( $\beta$ )    | 0.70524  | 49.74 |
|    |        |        |        |  | HOMO-4–<br>LUMO+3 ( $\alpha$ ) | 0.15207  | 2.31  |
|    |        |        |        |  | HOMO-4–<br>LUMO+5 ( $\alpha$ ) | -0.10763 | 1.16  |
|    |        |        |        |  | HOMO–<br>LUMO ( $\alpha$ )     | -0.20093 | 4.04  |
|    |        |        |        |  | HOMO–<br>LUMO+6 ( $\alpha$ )   | 0.11883  | 1.41  |
|    |        |        |        |  | HOMO-12 -<br>LUMO( $\beta$ )   | -0.27982 | 7.83  |
|    |        |        |        |  | HOMO-4 -<br>LUMO( $\beta$ )    | -0.31565 | 9.96  |

|    |        |           |        |  |                                |          |       |
|----|--------|-----------|--------|--|--------------------------------|----------|-------|
|    |        |           |        |  | HOMO-4-<br>LUMO+6( $\beta$ )   | 0.12280  | 1.51  |
|    |        |           |        |  | HOMO-3 -<br>LUMO( $\beta$ )    | 0.28345  | 8.03  |
|    |        |           |        |  | HOMO-3 -<br>LUMO-4( $\beta$ )  | -0.14006 | 1.96  |
|    |        |           |        |  | HOMO-<br>LUMO+1( $\beta$ )     | -0.18662 | 3.48  |
|    |        |           |        |  |                                |          |       |
| 17 | 0.0047 | 4.1957    | 295.50 |  | HOMO-<br>LUMO+7( $\beta$ )     | 0.47109  | 22.19 |
|    |        |           |        |  | HOMO-6-<br>LUMO ( $\alpha$ )   | 0.28601  | 8.18  |
|    |        |           |        |  | HOMO-2-<br>LUMO ( $\alpha$ )   | 0.23574  | 5.56  |
|    |        |           |        |  | HOMO-2-<br>LUMO+6 ( $\alpha$ ) | 0.13309  | 1.77  |
|    |        |           |        |  | HOMO-<br>LUMO+1 ( $\alpha$ )   | -0.14076 | 1.98  |
|    |        |           |        |  | HOMO-<br>LUMO+6 ( $\alpha$ )   | -0.43846 | 19.22 |
|    |        |           |        |  | HOMO-6-<br>LUMO ( $\beta$ )    | 0.10131  | 1.03  |
|    |        |           |        |  | HOMO-5-<br>LUMO+1( $\beta$ )   | 0.27365  | 7.49  |
|    |        |           |        |  | HOMO-2-<br>LUMO+1( $\beta$ )   | -0.25325 | 6.41  |
|    |        |           |        |  | HOMO-2-<br>LUMO+7( $\beta$ )   | -0.13767 | 1.89  |
|    |        |           |        |  | HOMO-1-<br>LUMO+1( $\beta$ )   | 0.36071  | 13.01 |
|    |        |           |        |  | HOMO-<br>LUMO+2( $\beta$ )     | 0.15677  | 2.46  |
| 18 | 0.0001 | 4.2050    | 294.85 |  | HOMO-1 -<br>LUMO+1( $\beta$ )  | 0.92232  | 85.07 |
|    |        |           |        |  | HOMO-6-<br>LUMO ( $\alpha$ )   | -0.11727 | 1.37  |
|    |        |           |        |  | HOMO-<br>LUMO+6 ( $\alpha$ )   | 0.16692  | 2.79  |
|    |        |           |        |  | HOMO-5-<br>LUMO+1( $\beta$ )   | -0.10376 | 1.07  |
|    |        |           |        |  | HOMO-2-<br>LUMO+1( $\beta$ )   | 0.13039  | 1.70  |
|    |        |           |        |  | HOMO-<br>LUMO+7( $\beta$ )     | -0.17716 | 3.14  |
|    |        |           |        |  |                                |          |       |
| 19 | 0.0003 | 4.2351 eV | 292.75 |  | HOMO-1 -<br>LUMO ( $\alpha$ )  | 0.87187  | 76.02 |

|  |    |        |        |        |                            |          |       |
|--|----|--------|--------|--------|----------------------------|----------|-------|
|  |    |        |        |        | HOMO-1 – LUMO ( $\alpha$ ) | -0.42991 | 18.48 |
|  |    |        |        |        | HOMO-1 – LUMO ( $\alpha$ ) | -0.20258 | 4.10  |
|  |    |        |        |        |                            |          |       |
|  | 20 | 0.0019 | 4.2715 | 290.26 | HOMO-2 – LUMO ( $\alpha$ ) | 0.90646  | 82.17 |
|  |    |        |        |        | HOMO-6 – LUMO ( $\alpha$ ) | -0.12282 | 1.51  |
|  |    |        |        |        | HOMO-3 – LUMO ( $\alpha$ ) | -0.17189 | 2.95  |
|  |    |        |        |        | HOMO-1 – LUMO ( $\alpha$ ) | 0.14212  | 2.02  |
|  |    |        |        |        | HOMO – LUMO ( $\alpha$ )   | 0.13860  | 1.92  |
|  |    |        |        |        | HOMO-5 – LUMO+1( $\beta$ ) | -0.14008 | 1.96  |
|  |    |        |        |        | HOMO – LUMO+7( $\beta$ )   | -0.12489 | 1.56  |
|  |    |        |        |        |                            |          |       |

**Table S2.** Electrochemical data of the complexes **1-3** in in methanol:DMF (9:1). TBAHFP (0.1 M) as the supporting electrolyte; scan rate - 0.1 V/ s.

| <b>Complex</b> | <b><math>E_{pc}</math>(V)</b> | <b><math>E_{pa}</math>(V)</b> | <b><math>E_{1/2}</math>(V)</b> |
|----------------|-------------------------------|-------------------------------|--------------------------------|
| 1              | -1.032                        | -0.411                        | -0.740                         |
| 2              | -0.951                        | -0.426                        | -0.688                         |
| 3              | - 0.919                       | -0.464                        | -0.691                         |

**Table S3.**  $k_{\text{cat}}$  values of previously reported phenoxazinone synthase-like activities of different Cu(II) complexes having salicylaldehyde derivative ligand.

| Sl no. | Catalyst                                                       | Solvent | $k_{\text{cat}}(\text{h}^{-1})$ | Ref. |
|--------|----------------------------------------------------------------|---------|---------------------------------|------|
| 1      | $[\text{Cu}_4(\text{L}^4)_4]$                                  | MeOH    | $1.21 \times 10^5$              | S1   |
| 2      | $[\text{CuL}^5_2]$                                             | MeOH    | 74.22                           | S2   |
| 3      | $[\text{Cu}_2(\text{L}^6)_3]\text{ClO}_4$                      | MeOH    | 78.14                           | S3   |
| 4      | $[\text{Cu}_2\text{L}^7_2\text{Cl}_2]$                         | MeOH    | $1.06 \times 10^3$              | S4   |
| 5      | $[\text{Cu}_2\text{L}^7_2\text{Cl}_2]$                         | MeCN    | $2.13 \times 10^2$              | S4   |
| 6      | $[\text{Cu}_2\text{L}^7_2\text{Cl}_2]$                         | DCM     | $2.84 \times 10^3$              | S4   |
| 7      | $[\text{CuL}^8\text{Na}(\text{NCS})]0.5\text{H}_2\text{O}$     | MeCN    | 3.72                            | S5   |
| 8      | $[\text{CuL}^8\text{Na}(\text{OCIO}_3)]0.25\text{H}_2\text{O}$ | MeCN    | 5.17                            | S5   |
| 9      | $[\text{CuL}^8\text{HgCl}_2]$                                  | MeCN    | 8.29                            | S5   |
| 10     | $[\text{Cu}_2(\text{L}^9)_3]\text{ClO}_4$                      | MeCN    | 78.14                           | S6   |
| 11     | $[\text{Cu}(\text{L}^{10})(\text{NCS})]_n$                     | DMF     | 33.76                           | S7   |
| 12     | $[\text{Cu}(\text{L}^{10})(\text{N3})]_n$                      | DMF     | 0.96                            | S7   |

Where the abbreviations of,  $\text{H}_2\text{L}^4 = N$ -(2-hydroxyethyl)-3-methoxysalicylalimine;  $\text{HL}^5 = (Z)$ -2-methoxy-6-(((2-methoxyphenyl)imino) methyl)phenol;  $\text{HL}^6 = (E)$ -1-((3-(dimethylamino)-propylimino)methyl)naphthalen-2-ol);  $\text{HL}^7 = 2$ -(( $E$ )-(2-(benzylthio)ethylimino)methyl)-phenol;  $\text{H}_2\text{L}^8 = N,N'$ -bis(3-ethoxysalicylidene)-2,2-dimethylpropane-1,3-diamine;  $\text{H}_2\text{L}^9 = N,N'$ -bis(3-methoxysalicylidene)-2,2-dimethylpropane-1,3-diamine;  $\text{HL}^{10} = (E)$ -4-chloro-2-[(2-propylaminoethylimino)methyl]phenol

Coordinates of the complex **3** using B3LYP level of theory with the basis sets 6-31G for C, H, O, S, N & Br and LANL2DZ for Cu centre.

E=-4064.8780711

|    |              |              |              |
|----|--------------|--------------|--------------|
| 29 | 0.637252000  | 0.551766000  | 0.250443000  |
| 35 | -6.740711000 | -0.895557000 | -0.161016000 |
| 16 | 2.446809000  | 4.919297000  | 0.069904000  |
| 8  | -1.045726000 | 1.316497000  | -0.299988000 |
| 7  | -0.227484000 | -1.138207000 | 0.786125000  |
| 7  | 1.687817000  | 2.171110000  | 0.316653000  |
| 7  | 2.407932000  | -0.620090000 | 0.311293000  |
| 1  | 2.817427000  | -0.287191000 | 1.188886000  |
| 6  | 1.973938000  | 3.327871000  | 0.201946000  |
| 6  | -1.506566000 | -1.411031000 | 0.715109000  |
| 1  | -1.836030000 | -2.404249000 | 1.039306000  |
| 6  | -2.531700000 | -0.534826000 | 0.246390000  |
| 6  | -2.256158000 | 0.791136000  | -0.238377000 |
| 6  | -4.902383000 | -0.221405000 | -0.184386000 |
| 6  | -3.872137000 | -1.015817000 | 0.259086000  |
| 1  | -4.070696000 | -2.017727000 | 0.624980000  |
| 6  | 4.742057000  | -0.905670000 | -0.608799000 |
| 6  | -4.651341000 | 1.084056000  | -0.659758000 |
| 1  | -5.475965000 | 1.697620000  | -1.003042000 |
| 6  | 0.738864000  | -2.132846000 | 1.288989000  |
| 1  | 0.321813000  | -3.148643000 | 1.269993000  |
| 1  | 0.984964000  | -1.893038000 | 2.333198000  |
| 6  | -3.360219000 | 1.576122000  | -0.684202000 |
| 1  | -3.146300000 | 2.575340000  | -1.043524000 |
| 6  | 1.997988000  | -2.050276000 | 0.421407000  |
| 1  | 2.800685000  | -2.679702000 | 0.824526000  |
| 1  | 1.768242000  | -2.398423000 | -0.590666000 |



|   |             |              |              |
|---|-------------|--------------|--------------|
| 6 | 5.106909000 | -2.117044000 | -1.219954000 |
| 1 | 4.404686000 | -2.617972000 | -1.881307000 |
| 6 | 3.365336000 | -0.306004000 | -0.809816000 |
| 1 | 3.411274000 | 0.784242000  | -0.861645000 |
| 1 | 2.905986000 | -0.671154000 | -1.733804000 |
| 6 | 5.674548000 | -0.255480000 | 0.219999000  |
| 1 | 5.415296000 | 0.697158000  | 0.675386000  |
| 6 | 6.372678000 | -2.673168000 | -1.001656000 |
| 1 | 6.644128000 | -3.605903000 | -1.485732000 |
| 6 | 6.938351000 | -0.811269000 | 0.441728000  |
| 1 | 7.650933000 | -0.295368000 | 1.077089000  |
| 6 | 7.289017000 | -2.022864000 | -0.167318000 |
| 1 | 8.272058000 | -2.451044000 | -0.000346000 |

Cartesian coordinates of complex 6

|    |              |              |              |
|----|--------------|--------------|--------------|
| 29 | 0.416325000  | 0.546353000  | 0.325048000  |
| 8  | -1.472091000 | 1.031005000  | 1.017308000  |
| 7  | -0.487968000 | 0.645919000  | -1.689487000 |
| 7  | 2.113386000  | 0.035745000  | -0.863902000 |
| 1  | 2.543197000  | 0.981730000  | -0.963072000 |
| 6  | -1.709200000 | 0.322149000  | -1.904022000 |
| 1  | -2.000613000 | -0.098753000 | -2.886013000 |
| 6  | -2.792753000 | 0.444241000  | -0.944263000 |
| 6  | -2.591196000 | 0.777101000  | 0.462213000  |
| 6  | 4.287537000  | -1.196264000 | -0.792853000 |
| 6  | -5.053430000 | 0.579742000  | 0.755237000  |
| 6  | 0.527740000  | 0.391863000  | -2.691658000 |
| 1  | 0.114626000  | -0.052715000 | -3.616392000 |
| 1  | 0.992545000  | 1.354316000  | -2.949924000 |
| 6  | -3.791597000 | 0.812190000  | 1.261747000  |
| 1  | -3.653837000 | 1.046584000  | 2.313552000  |
| 6  | 1.613439000  | -0.532746000 | -2.110730000 |
| 1  | 2.405772000  | -0.677270000 | -2.867707000 |
| 1  | 1.173823000  | -1.506591000 | -1.871947000 |
| 6  | 4.546404000  | -2.526435000 | -1.150512000 |
| 6  | 2.999242000  | -0.829817000 | -0.080234000 |
| 1  | 3.212672000  | -0.263945000 | 0.832645000  |
| 1  | 2.447338000  | -1.734236000 | 0.182956000  |
| 6  | 5.223037000  | -0.205465000 | -1.132275000 |
| 1  | 4.996421000  | 0.827604000  | -0.869760000 |
| 6  | 5.724759000  | -2.864053000 | -1.823834000 |
| 6  | 6.398259000  | -0.543756000 | -1.803850000 |
| 1  | 7.118634000  | 0.231882000  | -2.058962000 |
| 6  | 6.655931000  | -1.875436000 | -2.150876000 |

|    |              |              |              |
|----|--------------|--------------|--------------|
| 1  | 7.573148000  | -2.137286000 | -2.675947000 |
| 1  | 5.914118000  | -3.900859000 | -2.097403000 |
| 1  | 3.803558000  | -3.280730000 | -0.895580000 |
| 6  | -4.090721000 | 0.192428000  | -1.431673000 |
| 6  | -5.198473000 | 0.269014000  | -0.607956000 |
| 1  | -4.214033000 | -0.061742000 | -2.481914000 |
| 1  | -5.927213000 | 0.628675000  | 1.399040000  |
| 35 | -6.980740000 | -0.061994000 | -1.334631000 |
| 8  | 1.725909000  | 1.581214000  | 1.489416000  |
| 6  | 1.916731000  | 2.859145000  | 1.393550000  |
| 6  | 1.373980000  | 3.744943000  | 2.364607000  |
| 6  | 2.725225000  | 3.442337000  | 0.298385000  |
| 6  | 1.625503000  | 5.112372000  | 2.367504000  |
| 6  | 2.962326000  | 4.856864000  | 0.362834000  |
| 6  | 2.434428000  | 5.667873000  | 1.355625000  |
| 1  | 0.756524000  | 3.282837000  | 3.131329000  |
| 1  | 1.202205000  | 5.748539000  | 3.143781000  |
| 1  | 3.577701000  | 5.296971000  | -0.424928000 |
| 1  | 2.643010000  | 6.738189000  | 1.348045000  |
| 7  | 3.183499000  | 2.652883000  | -0.682098000 |
| 1  | 3.699057000  | 3.229892000  | -1.352313000 |
| 8  | 0.121282000  | -1.741538000 | 0.279082000  |
| 6  | -0.012913000 | -2.532228000 | 1.262683000  |
| 6  | 0.671206000  | -3.858847000 | 1.280418000  |
| 6  | -0.820342000 | -2.183572000 | 2.398528000  |
| 6  | 0.399082000  | -4.715144000 | 2.406635000  |
| 6  | -1.021994000 | -3.052465000 | 3.452830000  |
| 6  | -0.415142000 | -4.335327000 | 3.454780000  |
| 1  | -1.263597000 | -1.191044000 | 2.371423000  |
| 1  | 0.879114000  | -5.696265000 | 2.417100000  |

|   |              |              |             |
|---|--------------|--------------|-------------|
| 1 | -1.650023000 | -2.753369000 | 4.291202000 |
| 1 | -0.585007000 | -5.015541000 | 4.288910000 |
| 7 | 1.490971000  | -4.170958000 | 0.278298000 |
| 1 | 1.870908000  | -5.106126000 | 0.474423000 |

### References:

- S1. M. Mitra, T. Kundu, G. Kaur, G. Sharma, A. R. Choudhury, Y. Singh and R. Ghosh, *RSCAdv.*, 2016, **6**, 58831–58838.
- S2. S. Sengupta, B. Naath Mongal, S. Das, T. K. Panda, T. K. Mandal, M. Fleck, S. K. Chattopadhyay and S. Naskar, *J. Coord. Chem.*, 2018, **71(8)**, 1214–1233.
- S3. B. Biswas, *Inorg. Chim. Acta*, 2020, **505**, 119468.
- S4. A. K. Ghosh, A. Ali, Y. Singh, C. S. Purohit and R. Ghosh, *Inorg. Chim. Acta*, 2018, **474**, 156–163
- S5. S. Roy, M. G. B. Drew and S. Chattopadhyay, *Polyhedron*, 2018, **150**, 28–34
- S6. P. K. Mudi, N. Bandopadhyay, M. Joshi, M. Shit, S. Paul, A. R. Choudhury and B. Biswas, *Inorg. Chim. Acta*, 2020, **505**, 119468.
- S7. A. Mandal, A. Sarkar, A. Adhikary, D. Samanta and D. Das, *Dalton Trans.*, 2020, **49**, 15461-15472.
